1  
2  
3  
4  
5  
6  
7  
8  
9  
10  
11  
12  
13  
14  
15  
16  
17

## Reciprocal interaction between $I_{K1}$ and $I_f$ in biological pacemakers: A simulation study

Running Title: Role of  $I_{K1}$  and  $I_f$  in bio-pacemaking

Yacong Li<sup>1,2</sup>, Kuanquan Wang<sup>1</sup>, Qince Li<sup>2,3</sup>, Jules C. Hancox<sup>4</sup>, Henggui Zhang<sup>2,3,5\*</sup>

<sup>1</sup> School of Computer Science and Technology, Harbin Institute of Technology, Harbin, Heilongjiang Province, China

<sup>2</sup> Biological Physics Group, School of Physics and astronomy, The University of Manchester, Manchester, the Great Manchester, UK

<sup>3</sup> Peng Cheng Laboratory, Shenzhen, Guangdong Province, China

<sup>4</sup> School of Physiology, Pharmacology and Neuroscience, Medical Sciences Building, University Walk, Bristol, UK

<sup>5</sup> Key Laboratory of Medical Electrophysiology of Ministry of Education and Medical Electrophysiological Key Laboratory of Sichuan Province, Institute of Cardiovascular Research, Southwest Medical University, Luzhou, Sichuan Province, China

\* **Correspondence:** Henggui Zhang; [henggui.zhang@manchester.ac.uk](mailto:henggui.zhang@manchester.ac.uk)

## Abstract

Pacemaking dysfunction (PD) may result in heart rhythm disorders, syncope or even death. Current treatment of PD using implanted electronic pacemaker has some limitations, such as finite battery life and the risk of repeated surgery. As such, the biological pacemaker has been proposed as a potential alternative to the electronic pacemaker for PD treatment. Experimentally it has been shown that bio-engineered pacemaker cells can be generated from non-rhythmic ventricular myocytes (VMs) by knocking down genes related to the inward rectifier potassium channel current ( $I_{K1}$ ) or by overexpressing hyperpolarization-activated cyclic nucleotide gated channel genes responsible for the “funny” current ( $I_f$ ). Such approaches can turn the VM cells into rhythmic pacemaker cells. However, it is unclear if a bio-engineered pacemaker based on the modification of  $I_{K1}$ - and  $I_f$ -related channels simultaneously would enhance the ability and stability of bio-engineered pacemaking action potentials (APs). This study aimed to investigate by a computational approach the combined effects of modifying  $I_{K1}$  and  $I_f$  density on the initiation of pacemaking activity in human ventricular cell models. First, the possible mechanism(s) responsible for VMs to generate spontaneous pacemaking APs by changing the density of  $I_{K1}$  and  $I_f$  were investigated. Then the integral action of targeting both  $I_{K1}$  and  $I_f$  simultaneously on the pacemaking APs was analysed. Our results showed a reciprocal interaction between  $I_{K1}$  and  $I_f$  on generating stable and robust pacemaking APs in VMs. In addition, we thoroughly investigated the dynamical behaviours of automatic rhythms in VMs in the  $I_{K1}$  and  $I_f$  parameter space, providing optimal parameter ranges for a robust pacemaker cell. In conclusion, to the best of our knowledge, this study provides a novel theoretical basis for generating stable and robust pacemaker cells from non-pacemaking VMs, which may be helpful in designing engineered biological pacemakers for application purposes.

**Keywords:** bio-pacemaker, sinoatrial node, funny current ( $I_f$ ), inward rectifier potassium channel current ( $I_{K1}$ ), reciprocal interaction, stable pacemaking

## 38 **Author Summary**

39 Pacemaking dysfunction has become one of the most serious cardiac diseases, which may result in arrhythmia and even death.  
40 The treatment of pacemaking dysfunction by electronic pacemaker has saved millions of people in the past fifty years. But not  
41 every patient can benefit from it because of possible limitations, such as surgical implication and lack of response to autonomic  
42 stimulus. The development of bio-pacemaker based on gene engineering technology provides a promising alternative to electronic  
43 pacemaker by manipulating the gene expression of cardiac cells. However, it is still unclear how a stable and robust  
44 bio-pacemaker can be generated. The present study aims to elucidate possible mechanisms responsible for a bio-engineered  
45 pacemaker by using a computational electrophysiological model of pacemaking cells based on modifying ion channel properties  
46 of  $I_{K1}$  and incorporating  $I_f$  in a human ventricular cell model, mimicking experimental approaches of gene engineering. Using the  
47 model, possible pacemaking mechanisms in non-pacemaking cells, as well as factors responsible for generating robust and stable  
48 biological pacemaker, were investigated. It was shown that the reciprocal interaction between reduction of  $I_{K1}$  and incorporation  
49 of  $I_f$  played an important role for producing robust and stable pacemaking. This study provides a novel insight into understanding  
50 of the initiation of pacemaking behaviours in non-rhythmic cardiac myocytes, providing a theoretical basis for experimental  
51 designing of biological pacemakers.

## 52 **Introduction**

53 Currently, the electronic pacemaker implantation is the only non-pharmacological therapy for some patients with pacemaking  
54 dysfunctions (PD), such as sick sinus syndrome and atrioventricular heart-block, but it has some possible limitations (1).  
55 Implantation of pacemaker device may have complications for patients, especially for aged ones because of their infirm health (2).  
56 Pediatric patients can receive electronic pacemakers; however, the device has to be replaced as they grow and repeated surgeries  
57 are needed (3). Electronic devices can be subject to electromagnetic interference (4), which causes inconvenience to the patients.  
58 A further issue is that classical electronic pacemakers are insensitive not only to hormone stimulation (5) but also to autonomic

59 emotion responsiveness (4), although there are some attempts to make them respond to autonomic nervous control (6). In addition,  
60 the long-term use of electronic pacemakers has been reported to increase the risk of heart failure (7). Appropriately designed  
61 biological pacemakers (bio-pacemakers) have the potential to overcome some of the limitations of electrical device use (8). For  
62 example, engineered bio-pacemakers could potentially involve only minor surgical trauma for implantation as well as opportune  
63 chronotropic responses to creature emotion (9). In previous experimental studies, it has been shown that a bio-pacemaker can be  
64 engineered *via* adenoviral gene transduction (10-12) or lentiviral vector (13, 14) techniques, by which non-pacemaking cardiac  
65 myocytes (CMs) can be transformed to rhythmic pacemaker-like cells.

66 The native cardiac primary pacemaker, sinoatrial node (SAN), is a special region comprised of cells with distinct  
67 electrophysiological properties to cells in the working myocardium. Such intrinsic and special electrophysiological properties of  
68 SAN cells are mainly manifested by their small if not absent inward rectifier potassium channel current ( $I_{K1}$ ) (15), but a large  
69 “funny” current ( $I_f$ ) (16) that is almost absent in atrial and ventricular cells. In addition to absence of  $I_{K1}$  and presence of  $I_f$ , T-type  
70  $Ca^{2+}$  channel current ( $I_{CaT}$ ) (17) and sustained inward current ( $I_{st}$ ) (18) also contribute to spontaneous pacemaking activity in SAN  
71 cells. Such unique electrophysiological properties of SAN cells form a theoretical basis to engineer non-pacemaking CMs into  
72 spontaneous pacemaker cells. These non-pacemaker cells include native CMs, such as ventricular (11, 19-21), atrial (22) or  
73 bundle branch myocytes (23). They can also be stem cells, such as embryonic stem cells (24-26), bone marrow stem cells (13, 27,  
74 28), adipose-derived stem cells (29-31), or induced pluripotent stem cell (14, 32, 33).

75 With gene therapy, these cells are manipulated to provoke automaticity. In previous studies, knocking off the *Kir2.1* gene to  
76 reduce the expression of  $I_{K1}$  promoted spontaneous rhythms in newborn murine ventricular myocytes (VMs) (19); by  
77 reprogramming the *Kir2.1* gene in guinea-pigs, VMs also produced pacemaker activity when  $I_{K1}$  was suppressed by more than 80%  
78 (11, 20). As  $I_f$  plays an important role in the native SAN cell pacemaking, a parallel gene therapy manipulation to create  
79 engineered bio-pacemaker has been carried out by expressing the *HCN* gene family in non-rhythmic cardiac myocytes (34). It has

80 been shown that expressing *HCN2* produced escape beats in canine CMs (22, 23) and initiated spontaneous beats in neonatal rat  
81 VMs (21). *HCN* expression in stem cells-induced-CMs also enhanced their pacemaking rate (13, 27, 28, 35, 36). Overexpressing  
82 *HCN4* can also induce spontaneous pacemaking activity in mouse embryonic stem cells (37). However, acute expression of the  
83 *HCN* gene might have a side effect on the normal cardiac pacemaking activity (38-40) and the overexpression of the *HCN* gene in  
84 VMs can cause ectopic pacemaker automaticity and even arrhythmicity (41).

85 It has been suggested that a combined manipulation of  $I_{K1}$  and  $I_f$  may be a better alternative for creating a bio-pacemaker (42). It  
86 has been demonstrated that the expression of transcriptional regulator *TBX18*, which influenced both  $I_f$  and  $I_{K1}$  expression,  
87 generated appropriate autonomic responses in non-pacemaking CMs (10, 31, 43). In addition, reprogramming *TBX18* in porcine  
88 VMs did not show the increase of arrhythmia risk (12), indicating the probable superiority of manipulating  $I_{K1}$  and  $I_f$  jointly for  
89 generating a bio-pacemaker. Furthermore, Chen et al. (44) attempted to explore the generation of oscillation by manipulating the  
90 expressing level of *Kir2.1* and the *HCN* genes and suggested that a dynamic balance between *Kir2.1* and *HCN* was essential to  
91 initiate oscillation in HEK293 cells. In the absence of  $I_{K1}$ , spontaneous rhythmic oscillations might be inhibited due to an  
92 insufficiently repolarized membrane potential to activate  $I_f$ . However, HEK293 cells lack all the other ionic channels present in  
93 native SAN myocytes.

94 Computational modelling offers a means to investigate different approaches to generating stable pacemaking activity. It has been  
95 used to study possible roles of down-regulating  $I_{K1}$  in VMs (45-47) and combined action of overexpression of  $I_f$  with  
96 down-regulation of  $I_{K1}$  in inducing spontaneous pacemaking activity in SAN (42). Bifurcation analysis has also been used to  
97 explore the effect of changes in some individual ion channel current on the pacemaking activities of SAN cells (48) and genesis of  
98 automaticity in VMs (46, 49), showing the role of  $I_{K1}$ ,  $I_f$ ,  $I_{st}$  and  $Na^+/Ca^{2+}$  exchange current ( $I_{NaCa}$ ) in modulating the initiation and  
99 stability of pacemaking activity (49). But this approach was applied to simplified CMs model (46) and interplay between more  
100 than one ion channel currents on modulating bio-pacemaker APs has not been comprehensively investigated yet.

101 In this study, we constructed a bio-pacemaker model based on a human non-rhythmic VMs model (50) by manipulating  $I_{K1}$  and  
102 incorporating  $I_f$  (51) into the model. The aim of this study was to investigate (i) possible mechanism(s) underlying the pacemaking  
103 activity of the VMs in the  $I_{K1}$  and  $I_f$  parameter space; and (ii) the reciprocal interaction of reduced  $I_{K1}$  and increased  $I_f$  in  
104 generating stable pacemaking action potentials (APs) in them. In addition, possible factors responsible for impaired pacemaking  
105 activity due to inappropriate ratio between  $I_{K1}$  and  $I_f$  were also investigated. This study provides insightful understandings to  
106 generating stable and robust engineered bio-pacemaker.

## 107 **Results**

### 108 **Initiation of transient spontaneous depolarization**

109 In the basal VM cell model with the suppression of  $I_{K1}$  by 70% (the density of  $I_{K1}$  at -80 mV was 0.297 pA/pF), incorporating of  $I_f$   
110 (with a current density of -0.63 pA/pF at -80 mV in the I-V curve of  $I_f$  (S1B Fig)) was unable to depolarize the membrane  
111 potential and lead to spontaneous pacemaking activity because the excessive outward current of  $I_{K1}$  counteracted the inward  
112 depolarizing current. This state can be described by State-1 as shown in Eq. 8. However, when the density of  $I_f$  was increased to  
113 -1.89 pA/pF, spontaneous depolarization was provoked at the beginning of the transition period, however, the automaticity  
114 self-terminated after  $1.63 \times 10^5$  ms (Fig 1 A), showing a State-2 behaviour as described in Eq. 9.

115 We analysed possible ion channel mechanisms responsible for unstable and self-terminating pacemaking APs with the current  
116 densities of ( $I_{K1}$ ,  $I_f$ ) at (0.297pA/pF, -1.89 pA/pF) ('CASE 1'). Results in Fig 1 showed that during the time course of the  
117 spontaneous pacemaking, there were changes of intracellular ionic concentrations and the MDP. Through the  $\text{Na}^+$  permeability of  
118  $I_f$ , there was extra  $\text{Na}^+$  flowing into the cytoplasm during each of the APs, leading the intracellular  $\text{Na}^+$  concentration ( $[\text{Na}^+]_i$ ) to  
119 increase from 7.67 to 11.8 mM (Fig 1 B). The increased  $[\text{Na}^+]_i$  augmented the feedback mechanism of  $\text{Na}^+/\text{K}^+$  pumping activity,  
120 by which the  $\text{Na}^+/\text{K}^+$  pump current ( $I_{\text{NaK}}$ ) increased gradually with time (Fig 1 E). In addition, there was also an accumulation of  
121 the intracellular  $\text{Ca}^{2+}$  concentration ( $[\text{Ca}^{2+}]_i$ , Fig 1 C) during the time course of spontaneous pacemaking APs. Such an

122 accumulation of  $[Ca^{2+}]_i$  was due to the fact that the automaticity in VMs shortened the DI between two successive APs, leaving  
 123 insufficient time for  $Ca^{2+}$  in the cytoplasm to be extruded to restore to its initial value after each cycle of excitation. This  
 124 consequentially led to overload in  $[Ca^{2+}]_i$ , which suppressed the extent of the activation degree of the L-type calcium current ( $I_{CaL}$ ,  
 125 Fig 1 F), especially during the phase 0 of the pacemaking action potential. Furthermore, the overloaded  $[Ca^{2+}]_i$  increased the  $I_{NaCa}$   
 126 (S2 Fig) gradually with time, resulting in an elevated MDP (Fig 1 H) that inhibited the activation degree of the fast sodium  
 127 channel current ( $I_{Na}$ , Fig 1 D). All of these factors worked together, inhibiting the membrane potential to reach the take-off  
 128 potential, leading to self-terminated automaticity at  $1.63 \times 10^5$  ms (Fig 1 G).

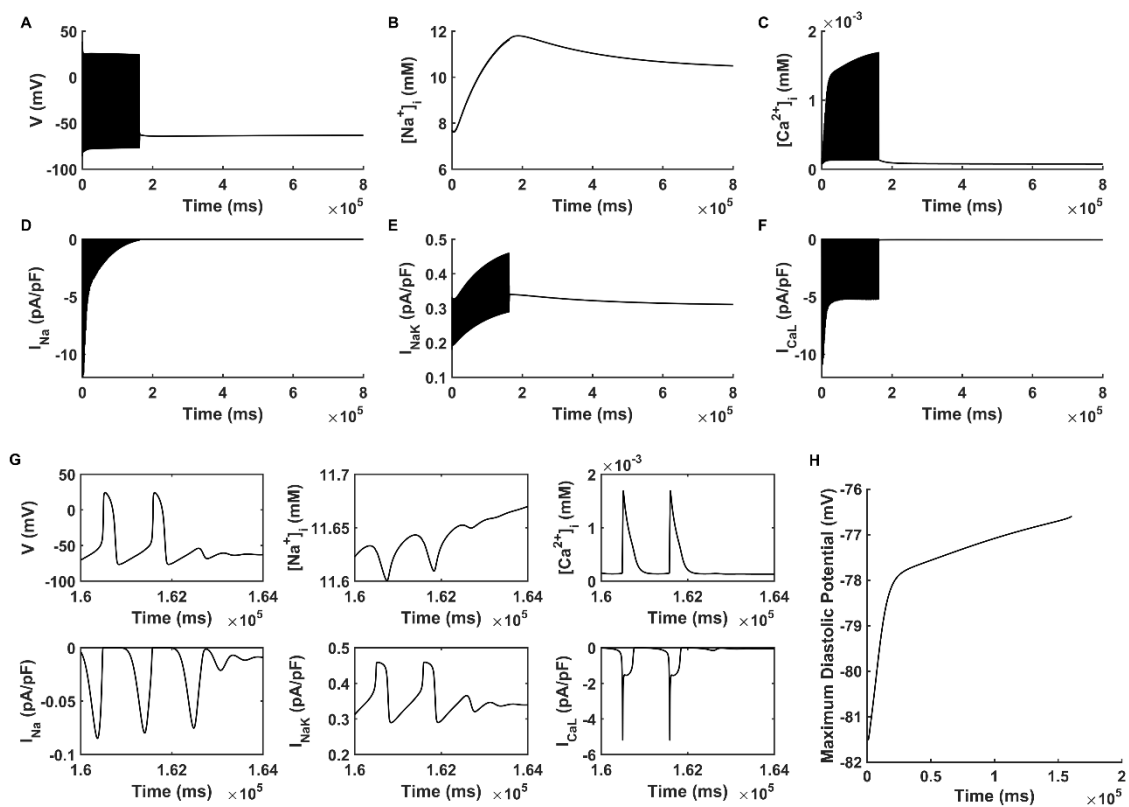

130 **Fig 1. Transient spontaneous pacemaking behaviour.**

131 (A-F) Membrane potential (V), intracellular Na<sup>+</sup> concentration ( $[Na^+]_i$ ), intracellular Ca<sup>2+</sup> concentration ( $[Ca^{2+}]_i$ ), fast sodium  
 132 current ( $I_{Na}$ ), L-type calcium channel current ( $I_{CaL}$ ) and Na<sup>+</sup>/K<sup>+</sup> pumping current ( $I_{NaK}$ ) with the current densities of ( $I_{K1}$ ,  $I_f$ ) at  
 133 ( $0.297$  pA/pF,  $-1.89$  pA/pF) during the entire simulating period of 800 s. (G) Expanded plots of (A-F) for the time course of

134 pacemaking self-termination ( $1.6 \times 10^5$  ms to  $1.64 \times 10^5$  ms). H: Maximum diastolic potential of spontaneous pacemaking  
135 behaviour of (A).

136 It was also possible to generate automaticity in the model by fixing the current density of  $I_f$  at a low value, but with a further  
137 reduction in  $I_{K1}$  density. S3 Fig shows the results when  $I_f$  was held at  $-0.63$  pA/pF, the current density of  $I_{K1}$  was reduced to  $0.178$   
138 pA/pF. In this case, pacemaking activity appeared in the model, but the automaticity was unstable and self-terminated due to  
139 similar mechanisms as shown in Fig1 for the increased- $I_f$  situation.

### 140 **Bursting pacemaking behaviour**

141 Fig 2 shows the intermittent bursting behaviour, which is generated with a different combination of  $I_{K1}$  and  $I_f$  current densities in  
142 the model. In the figure, the current densities of ( $I_{K1}$ ,  $I_f$ ) were held at ( $0.297$  pA/pF,  $-2.52$  pA/pF) (defined as ‘CASE 2’). Such  
143 kind of pacemaking state can be classified as State-3 (Eq. 10).

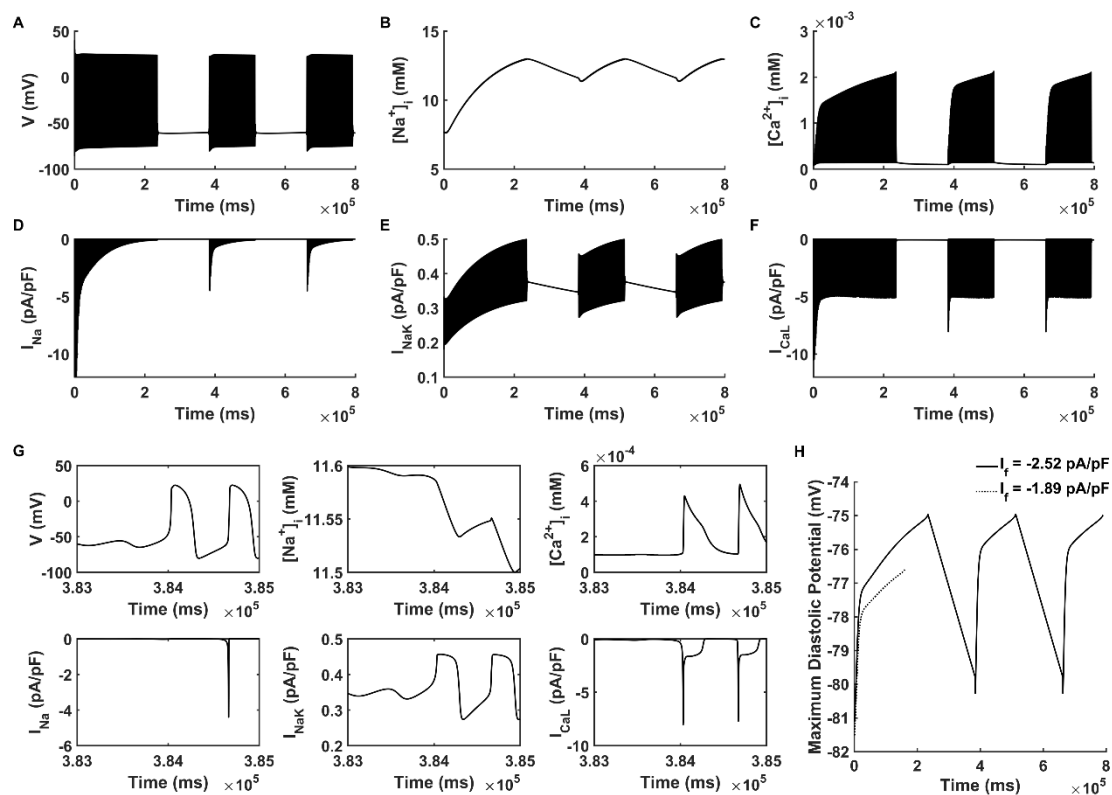

144  
145 **Fig 2. Bursting pacemaking behaviour.**



(A-F) Membrane potential (V), intracellular Na<sup>+</sup> concentration ([Na<sup>+</sup>]<sub>i</sub>), intracellular Ca<sup>2+</sup> concentration ([Ca<sup>2+</sup>]<sub>i</sub>), fast sodium channel current (I<sub>Na</sub>), Na<sup>+</sup>/K<sup>+</sup> pumping current (I<sub>NaK</sub>) and L-type calcium channel current (I<sub>CaL</sub>) with the current densities of (I<sub>K1</sub>, I<sub>f</sub>) at (0.297 pA/pF, -2.52 pA/pF) during the entire simulating period of 800 s. (G) Expanded plots of (A-F) for the time course of pacemaking resumption (3.83 × 10<sup>5</sup> ms to 3.85 × 10<sup>5</sup> ms). H: Maximum diastolic potential of automatic pacemaking activity when I<sub>f</sub> is -2.52 and -1.89 pA/pF (solid and dotted line respectively).

In CASE 2, the spontaneous oscillation was unstable, characterized by self-termination and then resumption after a quiescent period (Fig 2 A). Similar to CASE 1, the self-termination was accompanied by the overload of [Na<sup>+</sup>]<sub>i</sub> (Fig 2 B), the accumulation of [Ca<sup>2+</sup>]<sub>i</sub> (Fig 2 C), which caused the reduction of I<sub>Na</sub> (Fig 2 D), the increase of I<sub>NaK</sub> (Fig 2 E) and the decrease of I<sub>CaL</sub> (Fig 2 G). This suggested that the underlying mechanisms responsible for the self-termination of the pacemaking APs were similar to those of CASE 1.

It is of interest to analyse the mechanism(s) for the resumption of the pacemaking APs after a long pause. It was shown that, during the time course of the quiescent interval (from 2.36 × 10<sup>5</sup> ms to 3.84 × 10<sup>5</sup> ms in Fig 2 A-F), the intracellular Na<sup>+</sup> (Fig 2 B) continued to be extruded out of the cell by I<sub>NaK</sub> (Fig 2 E), and the intracellular Ca<sup>2+</sup> (Fig 2 C) extruded by the I<sub>NaCa</sub> (S4A Fig). As such, the [Na<sup>+</sup>]<sub>i</sub> (Fig 2 B) and [Ca<sup>2+</sup>]<sub>i</sub> (Fig 2 C) gradually decreased over time. A decrease in [Na<sup>+</sup>]<sub>i</sub> led to a gradually reduced I<sub>NaK</sub> over the time course of quiescence (Fig 2 E), which decreased its suppressive effect on depolarization. During the time period of quiescence, I<sub>CaL</sub> kept at a small magnitude (Fig 2 F). Via I<sub>NaCa</sub> (S4 Fig), the intracellular Ca<sup>2+</sup> was kept to be extruded out of the cell, leading to a decreased [Ca<sup>2+</sup>]<sub>i</sub>. Consequentially, a decrease in [Ca<sup>2+</sup>]<sub>i</sub> resulted in a reduced calcium-dependent inactivation of I<sub>CaL</sub>, leading to an increased I<sub>CaL</sub> (Fig 2 G), which facilitated the action potential generation. Moreover, as compared with CASE 1, the increase in I<sub>f</sub> also helped to produce a more depolarized MDP (Fig 2 H), allowing the membrane potential more easily to reach the take-off potential for initiation of the upstroke. All of these actions worked in combination to produce a full course of action potential with a sufficient amplitude that activated sufficient outward currents to repolarize the cell membrane to a range that

167 activated  $I_f$  and  $I_{Na}$ , facilitating the resumption of the spontaneous pacemaking activity at  $3.847 \times 10^5$  ms (Fig 2 G). This process of  
168 self-termination and resumption repeated alternately, which constituted bursting behaviour.

### 169 Persistent pacemaking activity

170 A further increase in  $I_f$  ( $(I_{K1}, I_f)$  at  $(0.297$  pA/pF,  $-3.15$  pA/pF)) produced a series of persistent spontaneous APs. Results are  
171 shown in Fig 3 (grey lines) for APs (Fig 3 A), together with a phase portrait of membrane potential ( $V$ ) and total membrane  
172 channel current ( $I_{total}$ ) (Fig 3 B),  $I_{K1}$  (Fig 3 C), and  $I_{CaL}$  (Fig 3 D). Although the spontaneous APs were sustained during the entire  
173 simulation period of 800 s, there were some incomplete depolarizations observed periodically (Fig 3 A, grey line) which can be  
174 classified as State-4 according to Eq. 11. This pacemaking situation was termed as 'CASE 3'.

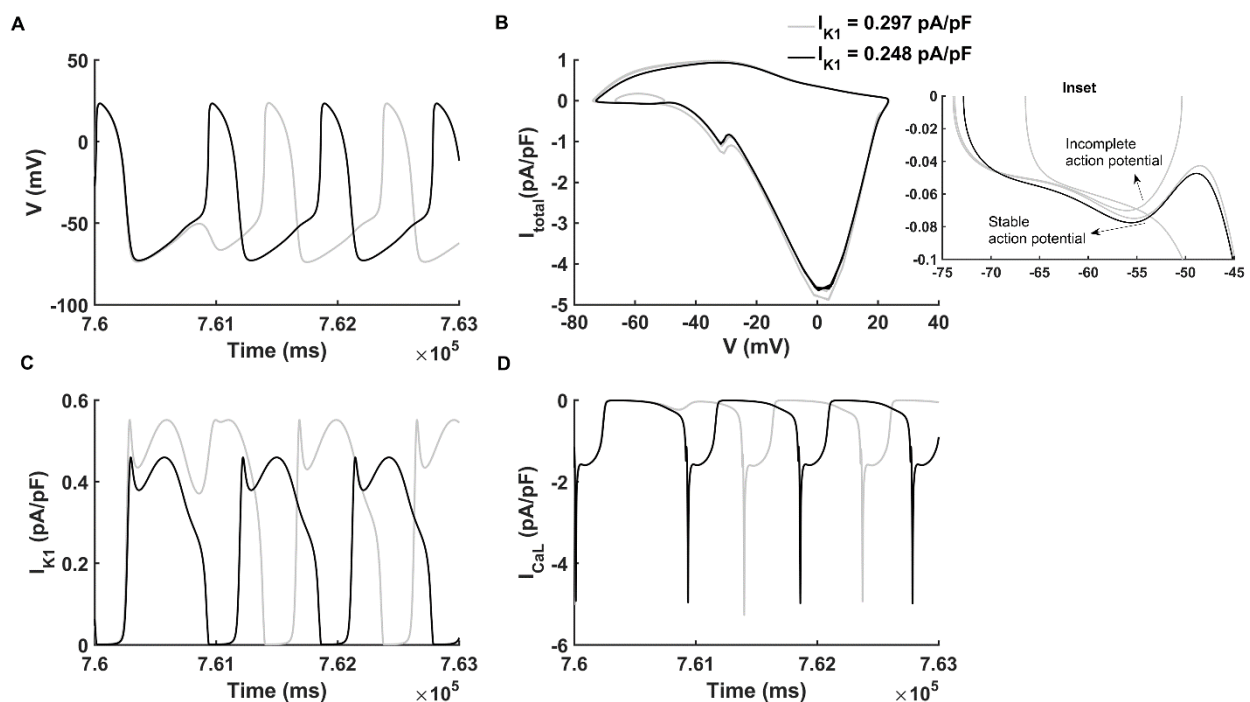

175  
176 **Fig 3. Persistent pacemaking activity.**

177 The current densities of  $(I_{K1}, I_f)$  of stable pacemaking activity and periodically incomplete pacemaking activity are at  $(0.248$   
178 pA/pF,  $-3.15$  pA/pF) (black lines) and  $(0.297$  pA/pF,  $-3.15$  pA/pF) (grey lines) respectively. (A-D) The membrane potential ( $V$ ),  
179 phase portraits of membrane potential against the total membrane channel current ( $I_{total}$ ), inward rectifier potassium channel

180 current ( $I_{K1}$ ) and L-type calcium channel current ( $I_{CaL}$ ) with simulating time course from  $7.6 \times 10^5$  to  $7.63 \times 10^5$  ms. (Inset)

181 Expanded plot for phase diagram during V from -75 to -45 mV and  $I_{total}$  from -0.1 to 0 pA/pF.

182 When the density of  $I_{K1}$  was further reduced to 0.248 pA/pF (Fig 3 C, black line), a stable pacemaking activity was established

183 (Fig 3A, black line), with an average CL of 895 ms and MDP of -72.63 mV. This kind of pacemaking state can be described as

184 State-5 by Eq. 12. In this condition, the pacemaking activity was robust and the pacing CL was close to that of the native human

185 SAN cells (approximately 800 - 1000 ms (52)). We termed stable pacemaking activity with ( $I_{K1}$ ,  $I_f$ ) at (0.248 pA/pF, -3.15 pA/pF)

186 as 'CASE 4'.

187 In order to understand potential mechanism(s) underlying the genesis of incomplete pacemaking potentials in CASE 3, phase

188 portraits of membrane potential against  $I_{total}$  for incomplete (grey line) and complete (black line) depolarization APs were plotted

189 and superimposed for comparison, as shown in Fig 3 B, with a highlight of phase portraits during the diastolic pacemaking

190 potential range from -75 mV to about -45 mV being shown in the inset. In the case of incomplete depolarization (CASE 3), there

191 was a greater  $I_{K1}$  (Fig 3 C) that counteracted the inward depolarizing current, leading to a smaller  $I_{total}$  during the diastolic

192 depolarization phase (see the grey line in Fig 3 B and the inset). Consequentially the membrane potential failed to reach the

193 take-off potential for the activation of  $I_{CaL}$  (Fig 3 D, grey line), leading to an incomplete course of action potential (Fig 3 A, grey

194 line). In CASE 4, with a reduced  $I_{K1}$  (Fig 3 C, black line), there was a greater  $I_{total}$  during the diastolic depolarization phase (Fig 3

195 B and the inset, black line), which drove the membrane potential to reach the take-off potential for the activation of  $I_{CaL}$  (Fig 3 D,

196 black line), leading to the upstroke of the action potential.

197 The frequency for the appearance of the incomplete AP was dependent on the density of  $I_{K1}$ . Incomplete depolarization occurred

198 less frequently, with progressively smaller  $I_{K1}$ . By way of illustration, the incomplete depolarization appeared once every three

199 cycles with the  $I_{K1}$  density at 0.297 pA/pF in CASE 3 (S5A Fig), but this became once every five cycles when  $I_{K1}$  density was

200 reduced to 0. 277 pA/pF  $I_{K1}$  (S5B Fig). This suggested that a large residual of  $I_{K1}$  in the VM model might result in the failure of

complete depolarization.

## Dynamic analysis in $I_{K1}$ and $I_f$ parameter space

Dynamic pacemaker AP behaviours were dependent on the balance of  $I_{K1}$  and  $I_f$  interactions. Further simulations were conducted in the  $I_{K1}$  and  $I_f$  parameter space to characterize this dependence. Results are shown in Fig 4. With differing combinations of  $I_{K1}$  and  $I_f$  density, five different regions for distinctive pacemaking dynamics could be discerned, including stable pacemaking activity (blue area, features described by Eq. 12), intermittence of failed depolarization (yellow area, features described by Eq. 11), bursting pacemaking behaviour (orange area, features described by Eq. 10), transient pacemaking activity (green area, features described by Eq. 9), and no automaticity (grey area, features described by Eq. 8). In each category, representative membrane potentials are illustrated at the bottom panel of the Fig 4.

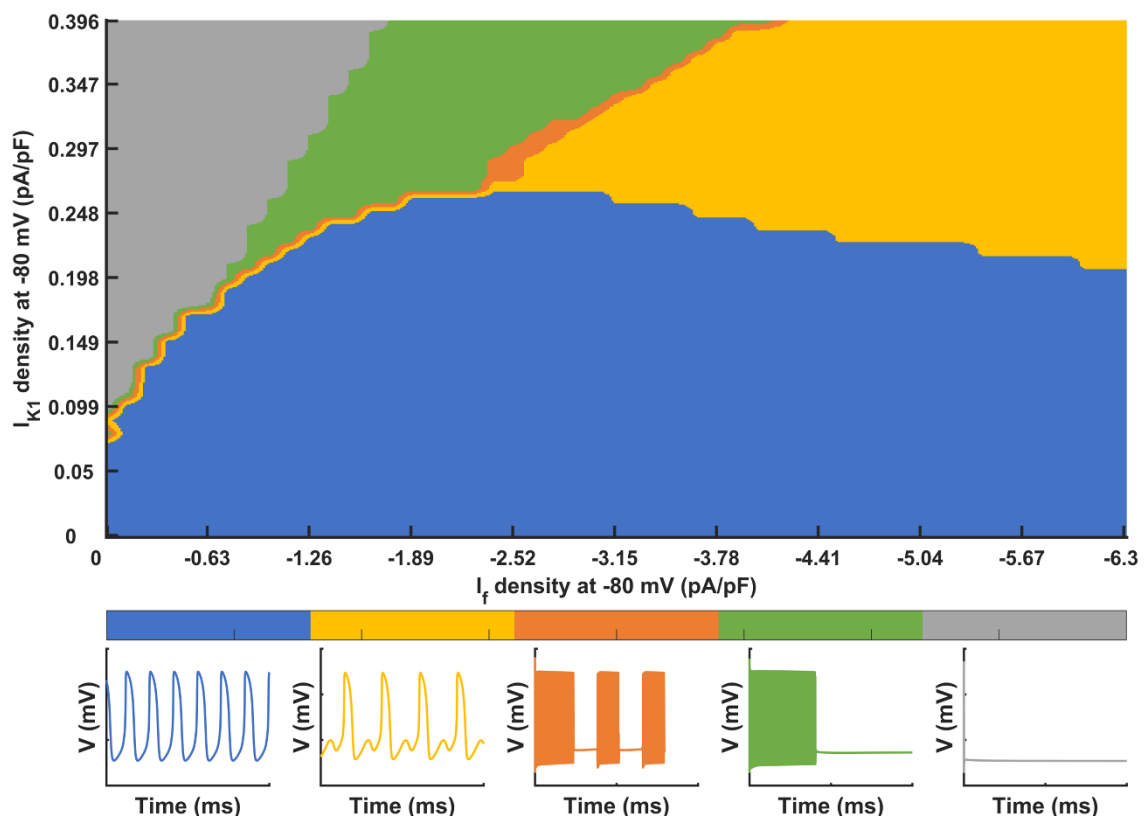

Fig 4. The dynamical behaviours of the pacemaking action potentials in  $I_{K1}$  and  $I_f$  parameter space.

Blue: stable pacemaking activity; Yellow: persistent pacemaking activity with periodic incomplete depolarization. Orange:

213 bursting pacemaking behaviour. Green: transient spontaneous pacemaking behaviour. Gray: no spontaneous pacemaking  
214 behaviour. In each category, the typical pacemaking action potentials are illustrated at the bottom panel.

215 With a fixed  $I_f$  density, alterations to  $I_{K1}$  could produce different types of pacemaking activities and this also applied when  $I_{K1}$  was  
216 fixed whilst  $I_f$  was changed. To illustrate, when  $I_f$  density was fixed at a density between -0.63 and -2.52 pA/pF, with a 60 – 80%  
217 block of  $I_{K1}$  (i.e.,  $I_{K1}$  density at -80 mV was in the range of 0.198-0.396 pA/pF), pacemaking activity was generated but with  
218 self-termination (Fig 4, green area). Then, a further reduction in  $I_{K1}$  or a slight increase in  $I_f$  induced bursting pacemaking  
219 behaviour, as shown by the orange area in Fig 4, which was between the boundaries marking the persistent automaticity and  
220 transient pacemaking activity regions. A further increase in  $I_f$  or suppression in  $I_{K1}$  could produce persistent automaticity (Fig 4,  
221 yellow and blue area). But when  $I_{K1}$  was greater than about 0.248 pA/pF, incomplete depolarization appeared periodically (Fig 4,  
222 yellow area). Finally, a stable and spontaneous pacemaking activity could be generated when  $I_{K1}$  was decreased to less than 0.248  
223 pA/pF at -80 mV with  $I_f$  included (Fig 4, blue area).

### 224 **Reciprocal role of $I_f$ and $I_{K1}$ in generating pacemaking APs**

225 Further analysis was conducted to investigate the reciprocal role of reduced  $I_{K1}$  and increased  $I_f$  in generating pacemaking APs. By  
226 sufficiently reducing  $I_{K1}$  to a density of 0.05 pA/pF alone, the model was able to generate spontaneous APs with a CL of 1011 ms.  
227 In this case, the incorporation of  $I_f$  with a small density helped to boost the pacemaking activity and increase the pacemaking  
228 frequency. It was shown that with the incorporation of  $I_f$  at a density of 0.63 pA/pF, the CL was reduced by 233 ms, changing  
229 from 1011 ms to 778 ms (Fig 5 A). Compared with the case of  $I_f$  absence, incorporation of  $I_f$  - even with a small density (-0.63  
230 pA/pF) - helped to depolarize cell membrane potential during the early DI phase (Fig 5 A and C). Moreover, the incorporation of  
231  $I_f$  led to an accumulation of  $[Na^+]_i$  (Fig 5 B) then increased amplitude of  $I_{NaCa}$  (Fig 5 D), which also contributed to the  
232 depolarization of membrane potential. As a result, the incorporation of  $I_f$  facilitated genesis of spontaneous APs and shortened the  
233 DI significantly, thus decreased the CL.

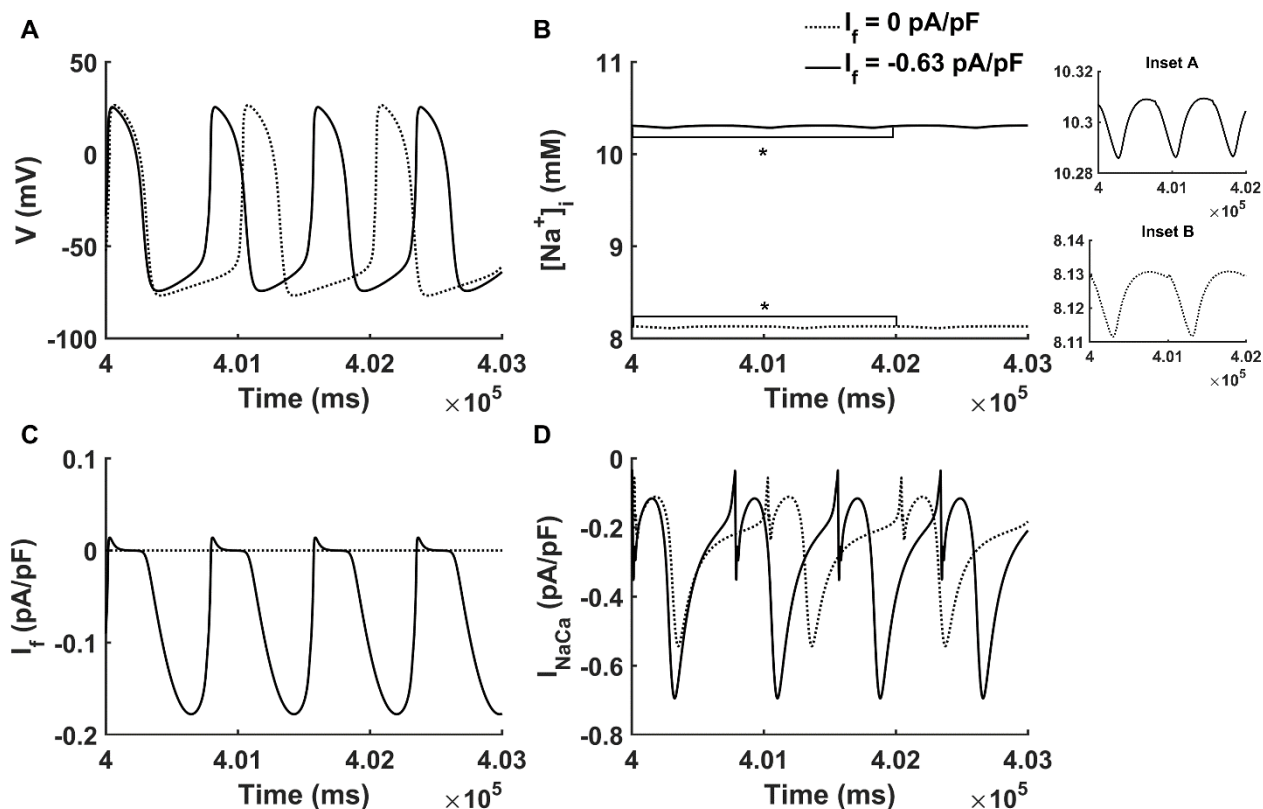

**Fig 5. Role of I<sub>f</sub> in pacemaking ability.**

(A-D) The membrane potential (V), intracellular Na<sup>+</sup> concentration ([Na<sup>+</sup>]<sub>i</sub>), hyperpolarization-activated channel current (I<sub>f</sub>), Na<sup>+</sup>/Ca<sup>2+</sup> exchange current (I<sub>NaCa</sub>) with simulating time course from 4 × 10<sup>5</sup> to 4.03 × 10<sup>5</sup> ms when the current densities of (I<sub>K1</sub>, I<sub>f</sub>) are at (0.05 pA/pF, 0 pA/pF) and (0.05 pA/pF, -0.63 pA/pF) (dotted and solid line respectively). (Inset A-B) Expanded plots of [Na<sup>+</sup>]<sub>i</sub> traces for the time course marked by the horizontal brackets with asterisks in (B).

With a fixed I<sub>K1</sub> density of 0.05 pA/pF, the relationship between the computed CL of pacemaking APs and I<sub>f</sub> density was found to be nonlinear as shown in Figure 6 A. In a range from -0.126 to -2.52 pA/pF, an increase in I<sub>f</sub> density produced a marked decrease in the CL (Fig 6 A), which was associated with an increase in the rate of membrane depolarization during the DI (diastolic depolarizing rate) (S6B Fig). In this range, an increase in I<sub>f</sub> caused an elevated MDP (Fig 6 B), as well as an accumulation of [Na<sup>+</sup>]<sub>i</sub> (Fig 6 C), which enhanced I<sub>NaCa</sub> (Fig 6 D). All of these contributed to the acceleration of the pacemaking activity. However, when I<sub>f</sub> density was over -2.52 pA/pF, there was a less dramatic decrease in CL with an increase of I<sub>f</sub> (Fig 6 A). This was

246 attributable to a reduced  $I_{Na}$  (Fig 6 F) as a consequence of gradual elevation of the MDP (Fig 6 B). Another factor was that the  
247 maximum density of  $I_f$  was not increased linearly (Fig 6 E) because of elevated MDP.

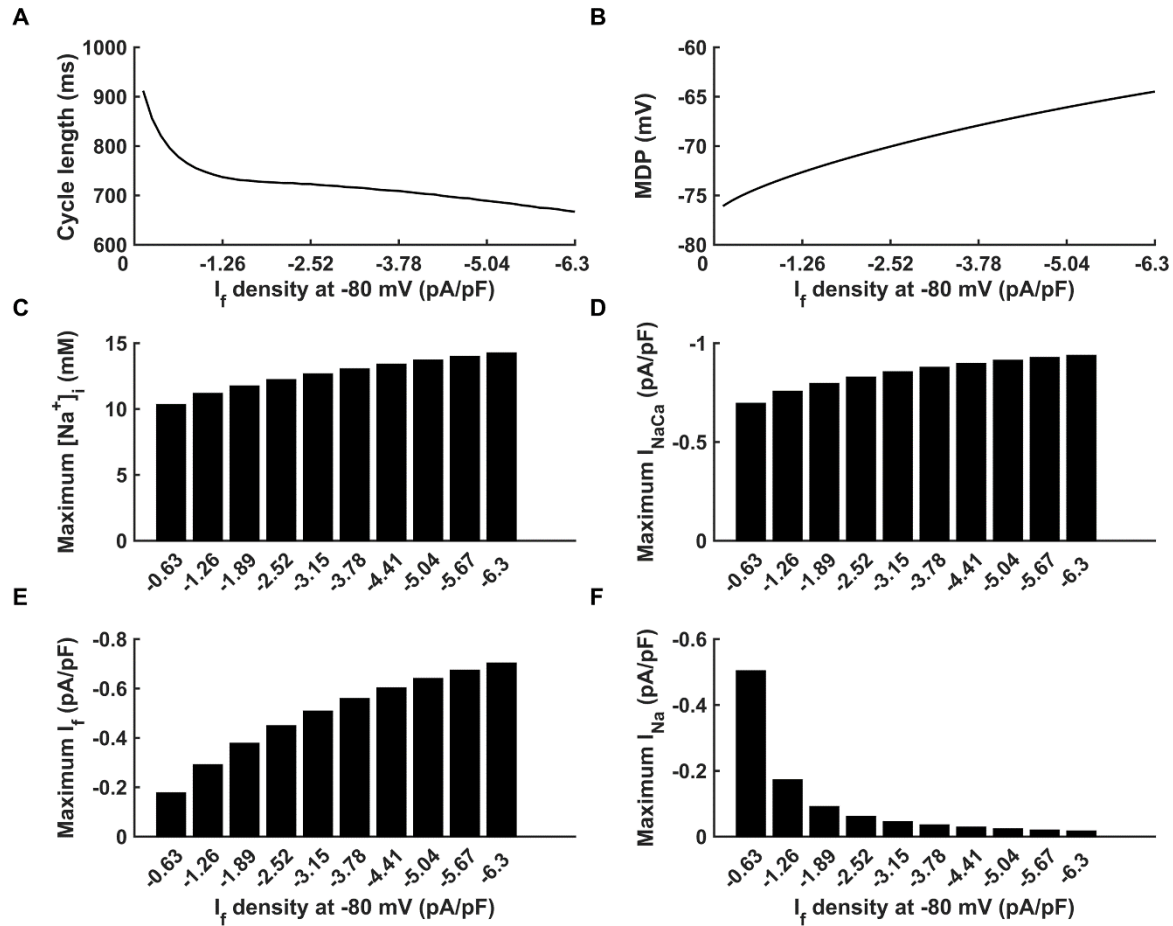

248

249 **Fig 6. Effect of  $I_f$  density on the pacemaking cycle length under fixed  $I_{K1}$  density.**

250  $I_{K1}$  density is fixed at 0.05 pA/pF. (A-B) Change of cycle length and maximum diastolic potential (MDP) with the increase of  $I_f$   
251 from 0 to -6.3 pA/pF. (C-F) Change of maximum intracellular  $Na^+$  concentration ( $[Na^+]_i$ ), maximum  $Na^+/Ca^{2+}$  exchange current  
252 ( $I_{NaCa}$ ), maximum funny current ( $I_f$ ) and maximum fast sodium current ( $I_{Na}$ ) during a pacemaking period with the increase of  $I_f$ .

253 Depending on the  $I_{K1}$  density, the relationship between CL and  $I_f$  density could also be biphasic as shown in Fig 7. With a small  
254  $I_{K1}$  density (0.05 pA/pF), the measured CL decreased monotonically with the increase in  $I_f$  density (Fig 7 A, dotted line).

255 However, with a large  $I_{K1}$  (0.198 pA/pF), the measured CL first decreased with an increased  $I_f$  density, but then increased with it

256 when  $I_f$  density was greater than  $-3.15$  pA/pF, implicating a slowdown in the pacemaking activity with the increase of  $I_f$  (Fig 7 A,  
 257 solid line). Such a slowdown of pacemaking APs with an increased  $I_f$  was mainly due to the prolonged DI (S7 Fig). This was  
 258 attributable to the delicate balance between the total integral of three dominant inward currents ( $I_{Na}$ ,  $I_{NaCa}$  and  $I_f$ ) ( $I_{in}$  as defined in  
 259 Eq. 14) and the total integral of four dominant outward currents ( $I_{K1}$ ,  $I_{NaK}$ ,  $I_{Kr}$  and  $I_{Ks}$ ) ( $I_{out}$  as defined in Eq. 15) during the DI  
 260 phase (Fig 7 B and C). At a low  $I_{K1}$  density of  $0.05$  pA/pF, with the increase in  $I_f$  density, there was a monotonic increase in both  
 261 of  $I_{in}$  and  $I_{out}$ , and the balance of them resulted in a monotonic decrease of CL (Fig 7, dotted lines). However, at a large  $I_{K1}$  density  
 262 (e.g.  $0.198$  pA/pF), an increase of  $I_f$  was associated with a monotonic increase in  $I_{out}$  (Fig 7 C, black line), but had a different  
 263 impact on  $I_{in}$ , which reached at a flat magnitude after  $I_f$  density was greater than  $-3.15$  pA/pF (Fig 7 B, black line).  
 264 Consequentially, at large  $I_f$ , a greater  $I_{out}$  out balanced the  $I_{in}$ , leading to a prolonged DI that increased the CL.

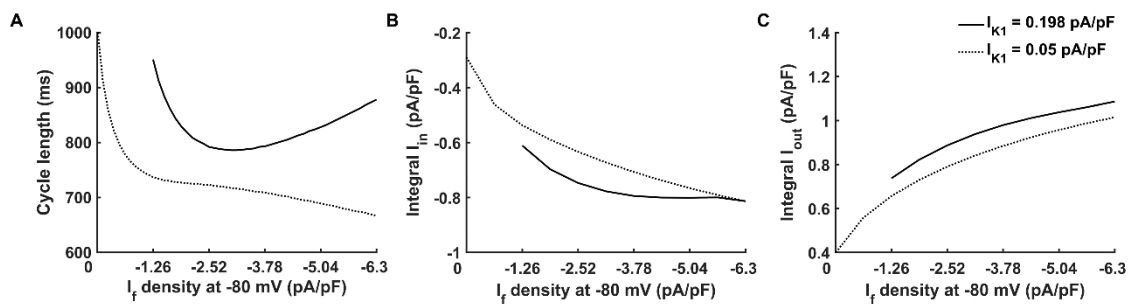

265

266 **Fig 7. Effect of  $I_f$  density on the pacemaking cycle length under different  $I_{K1}$  density.**

267  $I_{K1}$  density is  $0.198$  (solid line) and  $0.05$  pA/pF (dotted line) at  $-80$  mV. (A) Change of cycle length with the increase of  $I_f$  from 0  
 268 to  $-6.3$  pA/pF. (B) Change of the total integral of main inward currents (Integral  $I_{in}$ ) during diastolic interval phase. The inward  
 269 currents include fast sodium current ( $I_{Na}$ ),  $Na^+/Ca^{2+}$  exchange current ( $I_{NaCa}$ ) and funny current ( $I_f$ ). (C) Change of the total integral  
 270 of main outward currents (Integral  $I_{out}$ ) during diastolic interval phase. The outward currents include inward rectifier potassium  
 271 channel current ( $I_{K1}$ ),  $Na^+/K^+$  pumping current ( $I_{NaK}$ ), rapid delayed rectifier potassium channel current ( $I_{Kr}$ ) and slow delayed  
 272 rectifier potassium channel current ( $I_{Ks}$ ).



## Pacemaking cycle length in $I_{K1}$ and $I_f$ parameter space

A systematic analysis of the relationship between the calculated CL in the  $I_{K1}$  and  $I_f$  density parameter space is presented in Fig 8.

In the figure, the measured CL was coloured from 650 ms in dark red to 1000 ms in yellow. In this study, we regarded persistent pacemaking action potential with CL 1000 ms or less as ‘valid pacemaking activity’, therefore, only the CLs of the valid pacemaking potentials are shown in Fig 8.

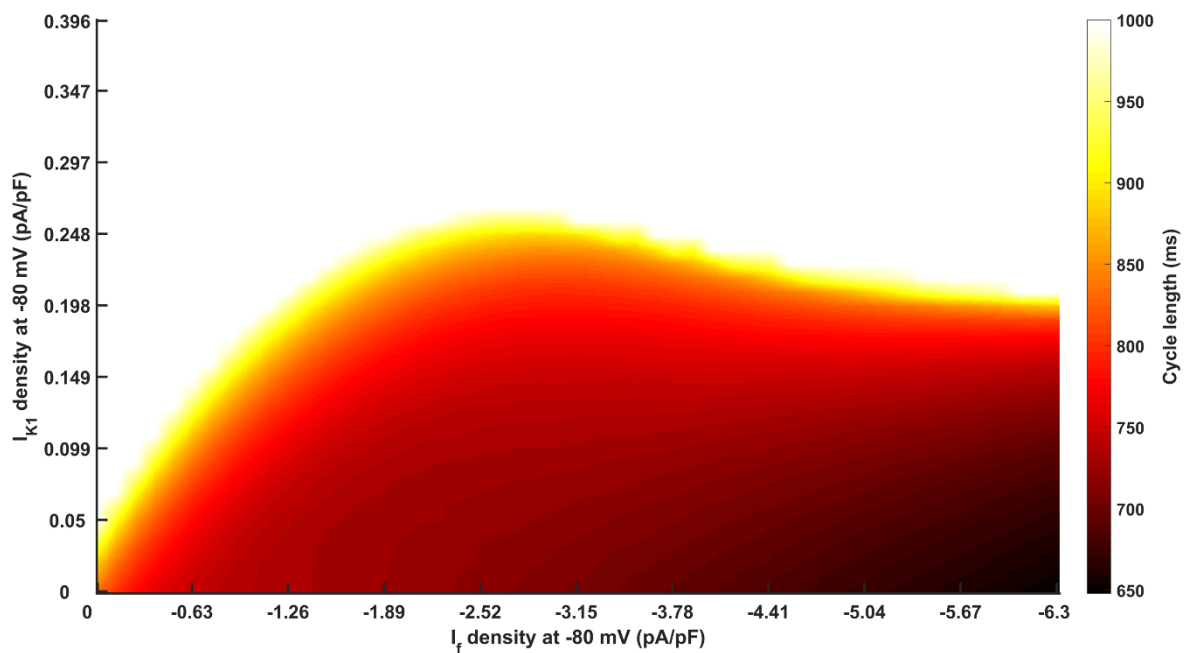

**Fig 8. Measured cycle length in the  $I_{K1}$  and  $I_f$  density parameter space.**

The density of  $I_{K1}$  is from 0 to 0.396 pA/pF and the density of  $I_f$  is from 0 to -6.3 pA/pF at -80 mV. The measured CL is coloured from 650 ms in dark red to 1000 ms in yellow. White means that pacemaking cycle length is ‘invalid’ (more than 1000 ms) or membrane potential is not persistent during the whole simulating time course.

It was shown that a sufficient depression in  $I_{K1}$  (up to 75%;  $I_{K1}$  density < 0.248 pA/pF) was required to produce a stable pacemaking action potential with a ‘valid’ pacemaking frequency. With the increase of the  $I_{K1}$  inhibition level, the CL became shortened at all  $I_f$  densities considered. Also, the more that  $I_{K1}$  was inhibited, the less  $I_f$  was needed to provoke ‘valid’ spontaneous pacemaking activity. By contrast, the effect of  $I_f$  on the CL presented two phases, which was dependent on the  $I_{K1}$  density. When

287  $I_{K1}$  was less than 0.198 pA/pF, the pacemaking ability became robust with the increase in  $I_f$  density. However, when  $I_{K1}$  was  
288 increased from 0.198 to 0.248 pA/pF, an increase in  $I_f$  actually slowed the pacemaking activity, leading to an increased CL.

## 289 **Discussion**

### 290 **Summary of major findings**

291 In this study, we construct a virtual bio-engineered pacemaking cell model based on a human VM model by a combination of  
292 reduction of  $I_{K1}$  and incorporation of  $I_f$ . Using the developed bio-pacemaker model, we investigate the combined actions of  
293 different  $I_{K1}$  and  $I_f$  permutations on the dynamical behaviours of membrane potential, ionic channel currents and intracellular ionic  
294 concentrations. It is shown that robust and stable pacemaking activity can be established by balancing the actions of reduced  $I_{K1}$   
295 and increased  $I_f$ , though the effect of each manipulation on pacemaking activity is different. While the action of a reduced  $I_{K1}$  on  
296 the pacemaking activity is consistent, that of an increased  $I_f$  is biphasic. Whilst the incorporation of  $I_f$  at an appropriate level  
297 promotes pacemaking activity, excessive  $I_f$  might result in abnormal pacemaking activity accompanied by abnormal intracellular  
298 ionic concentrations, which could be proarrhythmic. As a result, the reciprocal interaction between  $I_{K1}$  and  $I_f$  is crucial for  
299 producing stable spontaneous pacemaking activity in VMs. The results of this study may be useful for optimizing the future  
300 design of engineered bio-pacemakers.

### 301 **Role of $I_{K1}$ suppression on pacemaking activity**

302 The suppression of  $I_{K1}$  plays an important role in the generation of pacemaking activities in the VM cell model. Our simulation  
303 results have shown that a significant  $I_{K1}$  suppression (at least 60%) with the incorporation of  $I_f$  is required to provoke  
304 auto-rhythmicity in the model. With a modest suppression (i.e. 60-75% suppression of  $I_{K1}$ ), only unstable spontaneous APs can be  
305 produced. When  $I_{K1}$  is further suppressed by 75% - 100%, persistent, steady pacemaking behaviour can be initiated in our model  
306 with appropriate incorporation of  $I_f$  (Fig 4). These simulation results are in consistence with those of experimental findings, where  
307 it has been found that  $I_{K1}$  could be suppressed by 50 – 90 % by knocking out the Kir2.1 gene, and more than 80% inhibition of  $I_{K1}$

was required to produce a pacemaking phenomenon in guinea-pig's ventricular cavity (11, 20). It is also in agreement with previous bifurcation analyses in showing that it required  $I_{K1}$  to be reduced to at least 15% of the control value to transform a VM cell model to be auto-rhythmic (46). and a complete block of  $I_{K1}$  produced a spontaneous pacemaking activity with a CL of 795 ms (46), close to 833 ms when  $I_{K1}$  was totally suppressed in the present study. We have also found a monotonic relationship between the measured CL and the degree of  $I_{K1}$  suppression. It suggests that when  $I_{K1}$  is inhibited enough to induce automaticity, the more the  $I_{K1}$  is blocked, the faster the pacemaking activity is with all  $I_f$  densities considered (Fig 8). Similar results have also been observed in another ventricular cell model developed for human VMs (53) based on modifications of the model of O'Hara and Rudy (54) (S1 Text and S8 Fig, solid and dotted lines).

Though our simulation results suggest an important role of sufficient suppression of  $I_{K1}$  for generating persistent and stable pacemaking APs, it is noteworthy that the deficiency of  $I_{K1}$  has been reported to be lethal for adult rodents (55); and loss function of *Kir2* gene may prolong QT intervals as well as cause Andersen's syndrome (56). Consequently, suppression of  $I_{K1}$  from VM for generating a biological pacemaker may only be suitable when applied to highly localized, designated 'pacemaker' regions.

### **Role of $I_f$ in pacemaking activity**

$I_f$  has been shown to play an important role in generating pacemaking APs in both native (13, 21, 27, 28, 35, 36) and engineered pacemakers (42). Experimentally it has been shown that high expression of *HCN2* can initiate spontaneous beats in neonatal rat VMs (21, 35) and improve spontaneous beats in rabbit CMs (13). *HCN4* incorporation by the expression of *TBX18* can also initiate spontaneous pacemaking activity in both rodent VMs (10) and porcine VMs (12).

In the present study, we have also highlighted the role of  $I_f$  in generating pacemaking activity. Our simulation results have shown that with different  $I_f$  densities, the pacemaking activity may present different behaviours, including transient automaticity with self-termination, bursting behaviour, and persistent pacemaking (Fig 4). The incorporation of low amplitude of  $I_f$  can help to boost the pacemaking activity in the VM-based pacemaker model induced by  $I_{K1}$ -inhibition (Fig 5). It helped to promote pacemaking

activity, *via* its action of depolarization during the diastolic depolarization phase as well as its action on the intracellular ion concentrations. It has been shown that the inclusion of  $I_f$  in the VM cell model causes the accumulation of  $[Na^+]_i$ , which enhances  $Na^+/Ca^{2+}$  exchange, thus promoting membrane potential depolarization especially during the early stage of DI (Fig 5). Such a promoting action of  $I_f$  in bio-pacemaking was also shown in another ventricular cell model as shown in S1 Text (S8 Fig, solid and dashed lines).

An increase in  $I_f$  density can enhance the automaticity in most cases. However, the effect of  $I_f$  on the pacemaking activity was observed to be biphasic. In our simulation, increasing  $I_f$  from a small initial density was associated with an increased pacemaking rate manifested by a decreased CL. But when it was increased to be over  $-2.52$  pA/pF, excessive  $I_f$  resulted in an elevated MDP (Fig 6 B), which caused a reduced activation of  $I_f$  and  $I_{Na}$  (Fig 6 E and F), leading to a slowdown of the ability of pacemaking activity. The negative effect of excessive  $I_f$  on pacemaking APs was also observed in another ventricular pacemaker model (53) (S1 Text). A further increase in  $I_f$  density even terminated pacemaking activity (S9 Fig). This mechanism is verified by the fact that in the bio-pacemaker induced by HCN2 expression (57), co-expression of the skeletal muscle sodium channel 1 (*SkM1*), in order to hyperpolarize the action potential threshold, helped to counterbalance the negative effect of  $I_f$  overexpression, producing an accelerated depolarization phase. Furthermore, when  $I_{K1}$  was at a high value (e.g. density at  $0.198$  pA/pF), acute  $I_f$  even lengthened pacemaking period (Fig 7 A, black line). This simulation result is in agreement with a previous biological experimental study that observed a negative action of acute HCN gene expression in cardiac automaticity (41).

### **Reciprocal interaction between $I_{K1}$ and $I_f$**

Our study demonstrated that the reciprocal interaction between  $I_{K1}$  and  $I_f$  plays a crucial role in creating stable and persistent pacemaking. The present study has shown that only an optimal combination of  $I_{K1}$  and  $I_f$  can initiate stable pacemaking activity (Fig 4). In the presence of  $I_f$ , the greater the degree of  $I_{K1}$  suppression, the smaller was the  $I_f$  density required for the generation of spontaneous oscillation (Fig 4). And modulation of the two currents simultaneously helps to create a physiologically-like

---

350 pacemaker that is better than that produced by manipulating  $I_{K1}$  or  $I_f$  alone (Fig 8). Such observation of reciprocal interaction  
351 between  $I_{K1}$  and  $I_f$  in pacemaking is consistent with previous experimental observations. Previous studies have shown that  
352 although suppressing  $I_{K1}$  (11, 20), or incorporating sufficient  $I_f$  (21) alone was able to initiate pacemaking activity in VM cells, a  
353 pacemaker constructed by *TBX18* showed greater stability, due to its combined actions of  $I_{K1}$  reduction and  $I_f$  increase (10).  
354 Another experiment in porcine VMs (12) also indicated that *TBX18* expression did not increase the risk of arrhythmia, which  
355 means that a mixed-current approach is probably a superior means of producing a bio-pacemaker. Experiments in a *Kir2.1/HCN2*  
356 HEK293 cell (44) and *Kir2.1/HCN4* (42) showed that  $I_{K1}$  may actually recruit more  $I_f$  by activating current at more negative  
357 membrane voltages, because  $I_{K1}$  was the only negative current in these experiments. Our simulation, however, did not yield such a  
358 result because the interaction of other positive currents (such as  $I_{NaK}$ ,  $I_{Kr}$  and  $I_{Ks}$ ) contributed to the hyperpolarization of membrane  
359 potential and helped the activation of  $I_f$ .

360 In addition, simulation results showed that  $I_{K1}$  expression level may influence the  $I_f$ 's effect on the pacemaking activity. Excessive  
361  $I_{K1}$  hindered  $I_f$ 's ability to modulate pacemaking activity (Fig 7A and Fig 8). An experiment showed a coincident result that the  
362 expression of HCN2 in adult rat VMs could not cause spontaneous beats due to the high expression of  $I_{K1}$  (21), but in neonatal rats,  
363 the  $I_{K1}$  was less so that expressing HCN2 could provoke automaticity.

## 364 **Limitations**

365 The limitations of human VMs model we used in this study has been described elsewhere (58). In this study, the  $I_f$  formulation of  
366 human SAN (51) was incorporated into the original VMs model. The properties of  $I_f$ , including the conductance of  $I_f$ , the  
367 half-maximal activation voltage ( $V_{1/2}$ ) and time constants of the activation, may present species-dependence. In this study, we  
368 only consider the conductance of  $I_f$  but have not discussed other properties of  $I_f$ .

369 In addition, in this study, we only investigated the pacemaking action potential at the single-cell level, without considering the  
370 intercellular electrical coupling between pacemaker cells as presented in the SAN tissue. Mathematical analysis showed that the

incorporation of  $I_{st}$  and  $I_{CaT}$  into VMs may promote the pacemaking ability of ventricular pacemaker in the coupled-cell model (49). However, up to now, there is no experimental study conducted yet to produce pacemaker cells from VMs by modifying the expression of  $I_{st}$  and  $I_{CaT}$ , thus we did not discuss them in the present study. It is necessary to highlight these limitations, they nevertheless do not affect our conclusions on the underlying pacemaking mechanisms of engineered bio-pacemaker cells, especially regarding the reciprocal interaction of  $I_{K1}$  and  $I_f$  for a robust bio-pacemaker in modified VMs.

## Methods

### Single bio-pacemaker cell model

Previous experimental studies (10, 11, 19-21) implemented the suppression of *Kir2.1*, the incorporation of *HCN* channels and the expression of *TBX18* to induce pacemaking in VMs. In this study, we used a mathematical model of human VMs (50) as the basal model to investigate possible pacemaking mechanisms in VM-transformed pacemaking cells. In brief, the basal VM cell model can be described by the following ordinary differential equation:

$$\frac{dV}{dt} = - \frac{I_{ion}}{C_m} \quad (1)$$

where  $V$  is the voltage across cell membrane surfaces,  $t$  is time,  $I_{ion}$  is the sum of all transmembrane ionic currents, and  $C_m$  cell capacitance.

The  $I_{ion}$  in the original ventricular model is described by the following equation:

$$I_{ion} = I_{Na} + I_{K1} + I_{to} + I_{Kr} + I_{Ks} + I_{CaL} + I_{NaCa} + I_{NaK} + I_{pCa} + I_{pK} + I_{bCa} + I_{bNa} \quad (2)$$

where  $I_{Na}$  is fast sodium channel current,  $I_{K1}$  is inward rectifier potassium channel current,  $I_{to}$  is transient outward current,  $I_{Kr}$  is rapid delayed rectifier potassium channel current,  $I_{Ks}$  is slow delayed rectifier potassium channel current,  $I_{NaCa}$  is  $Na^+/Ca^{2+}$  exchange current,  $I_{NaK}$  is  $Na^+/K^+$  pump current,  $I_{pCa}$  and  $I_{pK}$  are plateau  $Ca^{2+}$  and  $K^+$  currents, and  $I_{bCa}$  and  $I_{bNa}$  are background  $Ca^{2+}$  and  $Na^+$  currents. The formulations and their parameters for the ionic channels of human VM cells were listed in Ref. (50, 58).

391 To mimic the reduction of *Kir2.1* expression (11, 19, 20) or suppressing  $I_{K1}$  by expressing *TBX18* (10), in simulations,  $I_{K1}$  was  
 392 decreased by modulating its macroscopic channel conductance ( $G_{K1}$ ). To mimic the incorporation of  $I_f$  in VMs experimentally  
 393 (21), we modified the basal model of Eq. 2 by incorporating human SAN  $I_f$  formulation (51). In simulations,  $I_f$  was modulated by  
 394 changing its channel conductance ( $G_f$ ).

395 As a result, the  $I_{ion}$  for the bio-pacemaker model can be described as:

$$396 \quad I_{ion} = I_{Na} + I_{K1} + I_{to} + I_{Kr} + I_{Ks} + I_{CaL} + I_{NaCa} + I_{NaK} + I_{pCa} + I_{pK} + I_{bCa} + I_{bNa} + I_f$$

397 (3)

398 where  $I_{K1}$  could be expressed by

$$399 \quad I_{K1} = S_{K1} G_{K1} \sqrt{\frac{K_o}{5.4}} x_{k1\infty} (V_m - E_K) \quad \square\square\square \quad (4)$$

400 where  $G_{K1}$  is the conductance of  $I_{K1}$ ,  $x_{k1\infty}$  is a time-independent inward rectification factor,  $K_o$  is extracellular  $K^+$  concentration  
 401 and  $E_K$  is the equilibrium potentials of  $K^+$ .  $S_{K1}$  is a scaling factor used to simulate the change of  $I_{K1}$  expression level.

402  $I_f$  has two ionic channels and could permeate  $Na^+$  and  $K^+$  respectively.  $I_f$  could be described by

$$403 \quad I_f = I_{f,Na} + I_{f,K} \quad \square\square\square \quad (5)$$

$$404 \quad I_{f,Na} = S_f G_{f,Na} y (V - E_{Na}) \quad \square\square\square\square \quad (6)$$

$$405 \quad I_{f,K} = S_f G_{f,K} y (V - E_K) \quad \square\square\square \quad (7)$$

406 where  $G_{f,Na}$  and  $G_{f,K}$  are maximal  $I_{f,Na}$  and  $I_{f,K}$  channel conductance,  $y$  is a time-independent inward rectification factor that is a  
 407 function of voltage,  $E_{Na}$ ,  $E_K$  are equilibrium potentials of  $Na^+$  and  $K^+$  channels respectively, and  $S_f$  is a scaling factor used to  
 408 simulate the change of  $I_f$  expression level.

409 Formulations of other channel currents for the VM cell model are the same as those in the original model in Ref. (50).

## Evaluating criterion of the pacemaking stability and ability

To analyse the effect of  $I_{K1}$  and  $I_f$  on pacemaking activity, we simulated the membrane potential under different current densities of  $I_{K1}$  and  $I_f$ , with  $I_{K1}$  being reduced systematically by from 60% to 100% (i.e.,  $I_{K1}$  density at -80 mV changed from 0.396 to 0 pA/pF while the  $I_{K1}$  density in the original basal model is 0.99 pA/pF at -80 mV in I-V curve). The representative I-V relation curve under different inhibition of  $I_{K1}$  is shown in S1A Fig.  $I_f$  density was increased by from 0 to 10 folds with a basal value of -0.63 pA/pF at -80 mV in I-V curve (i.e.,  $I_f$  density changed from 0 to -6.3 pA/pF at -80 mV). The representative I-V relation curve under different incorporation of  $I_f$  is shown in S1B Fig.

Two characteristics were used to quantify the state of membrane potentials generated by the ventricular pacemaker model: the continuity and validity of spontaneous APs. The continuity was used to quantify whether or not the automaticity of membrane potential could sustain with time; whilst the validity was used to characterize whether every automatic wave was biologically-valid or not. As such, we defined the following:

W: a valid wave. An action potential whose wave trough was less than -20 mV and wave crest was more than 20 mV could be considered as a valid wave.

$\alpha W, \alpha < 1$ : an incomplete wave.

R: a resting period lasting 1000 ms.

$W^n$ : the concatenation of n W's.

(W R): the concatenation of W and R.

As such, none pacemaking behaviour during the entire simulation period could be described as State-1:

$$R^n, n \in \mathbb{N}^+ \quad (8)$$



429 Transient spontaneous pacemaking behaviour could be described as State-2:

$$430 \quad (W^m, R^n), m, n \in \mathbb{N}^+ \quad (9)$$

431 Bursting pacemaking behaviour could be described as State-3:

$$432 \quad (W^{m_i}, R^{n_i})^M, i \in [1, M], M, m_i, n_i \in \mathbb{N}^+ \quad (10)$$

433 Persistent pacemaking activity with periodically incomplete depolarization could be described as State-4:

$$434 \quad (W^m, \alpha W)^M, \alpha < 1, m, M \in \mathbb{N}^+ \quad (11)$$

435 Stable pacemaking activity could be described as State-5:

$$436 \quad W^m, m \in \mathbb{N}^+ \quad (12)$$

437 With regard to the pacemaking ability, when the pacemaking behaviour was stable, the cycle length (CL) under varied  $I_{K1}$  and  $I_f$   
438 was calculated. The CL was defined as the averaged wavelength of pacemaking activity over a period of simulation of over  $4 \times 10^5$   
439 ms, ensuring the accuracy of the computed CL. As the basal model was for VMs, a long simulation period was necessitated to  
440 achieve a completely stable pacemaking status and minimize the effect of the transition period.

### 441 **Characteristics of pacemaking during diastolic interval**

442 The length of the diastolic interval (DI) is an important measure to characterize the pacemaking ability. In this study, we defined  
443 that DI as the time interval between the time of maximum diastolic potential (MDP) (S6A Fig,  $t_1$ ) and the time when the  
444 membrane potential reaches at -55 mV (i.e., around the activation potential of the  $I_{CaL}$ ) (S6A Fig,  $t_2$ ). The diastolic upstroke  
445 velocity during DI was defined as the change rate of the membrane potential, taking the following formulation:

$$446 \quad \text{diastolic upstroke velocity} = \frac{\text{MDP} - (-55)}{t_2 - t_1} \quad (13)$$

447 The unit of diastolic upstroke velocity was V/s.

448 The main inward currents which helped to depolarize membrane potential during DI are  $I_{Na}$ ,  $I_{NaCa}$  and  $I_f$ . Their contribution can be  
449 described by an average integral during DI:

$$450 \quad I_{in} = \frac{\int_{t_1}^{t_2} (I_{Na} + I_{NaCa} + I_f)}{t_2 - t_1} \quad (14)$$

451 Similarly, the main outward currents which held membrane potential at diastolic potential during DI are  $I_{K1}$ ,  $I_{NaK}$ ,  $I_{Kr}$  and  $I_{Ks}$ , the  
452 integral of which can be described as:

$$453 \quad I_{out} = \frac{\int_{t_1}^{t_2} (I_{K1} + I_{NaK})}{t_2 - t_1} \quad (15)$$

454

## 455 **Supporting Information**

### 456 **S1 Fig. The I-V curve of $I_{K1}$ and $I_f$ with different expression level.**

457  $S_{K1}$  and  $S_f$  are defined as scaling factors used to simulate the change of  $I_{K1}$  and  $I_f$  expression level. (A) The I-V curve of  $I_{K1}$  with  
458  $S_{K1}$  of 1, 0.4, 0.1 that gives  $I_{K1}$  densities in the I-V curve at -80 mV 0.99, 0.396 and 0.099 pA/pF respectively. (B) The I-V curve  
459 of  $I_f$  with  $S_f$  of 1, 5, 10 that gives  $I_f$  densities in the I-V curve at -80 mV -0.63, -3.15 and -6.3 pA/pF respectively.

### 460 **S2 Fig. $Na^+/Ca^{2+}$ exchange current ( $I_{NaCa}$ ) of a transient pacemaking behaviour.**

461 (A)  $I_{NaCa}$  during the entire simulating period of 800 s with the current densities of ( $I_{K1}$ ,  $I_f$ ) at (0.297pA/pF, -1.89 pA/pF). (B)  
462 Expanded plots of  $I_{NaCa}$  traces for the time course from  $1.6 \times 10^5$  to  $1.64 \times 10^5$  ms marked by the horizontal brackets with asterisks  
463 in (A).

### 464 **S3 Fig. Transient spontaneous pacemaking behaviour.**

465 Membrane potential (V) during the entire simulation period of 400 s with the current densities of ( $I_{K1}$ ,  $I_f$ ) at (0.178 pA/pF, -0.63  
466 pA/pF).

### 467 **S4 Fig. $Na^+/Ca^{2+}$ exchange current ( $I_{NaCa}$ ) of a bursting pacemaking behaviour.**

468 (A)  $I_{NaCa}$  with the current densities of ( $I_{K1}$ ,  $I_f$ ) at (0.297 pA/pF, -2.52 pA/pF) during the entire simulating period of 800 s. (B)  
469 Expanded plots of  $I_{NaCa}$  traces for the time course from  $3.83 \times 10^5$  ms to  $3.85 \times 10^5$  ms marked by the horizontal brackets with  
470 asterisks in (A).

471 **S5 Fig. Partial failure of spontaneous action potentials with different densities of  $I_{K1}$ .**

472 (A) Membrane potential (V) with the current densities of ( $I_{K1}$ ,  $I_f$ ) at (0.297 pA/pF, -3.15 pA/pF) during simulating time course  
473 from  $3.6 \times 10^5$  to  $3.7 \times 10^5$  ms. (B) Membrane potential (V) with the current densities of ( $I_{K1}$ ,  $I_f$ ) at (0.277 pA/pF, -3.15 pA/pF)  
474 during simulating time course from  $3.6 \times 10^5$  to  $3.7 \times 10^5$  ms.

475 **S6 Fig. Change of diastolic depolarizing rate with the increase of  $I_f$  density.**

476 (A) Definition of diastolic depolarizing rate. MDP: maximum diastolic potential;  $t_1$ : the time when membrane potential is MDP;  
477  $t_2$ : the time when potential arrives -55 mV (i.e., around the activation potential of the  $I_{CaL}$ ). (B) Change of diastolic depolarizing  
478 rate with the increase of  $I_f$  density from 0 to -6.3 pA/pF when  $I_{K1}$  density at -80 mV is at 0.05 pA/pF.

479 **S7 Fig. Prolonged cycle length under greater  $I_f$  density.**

480 Membrane potential (V) with the current densities of ( $I_{K1}$ ,  $I_f$ ) at (0.05 pA/pF, -3.78 pA/pF) and (0.05 pA/pF, -5.04 pA/pF) (solid  
481 and dotted line respectively).

482 **S8 Fig. Model-dependence test – stable pacemaking behaviour.**

483 Membrane potential (V) with the current densities of ( $I_{K1}$ ,  $I_f$ ) at (0.198 pA/pF, -0.63 pA/pF), (0.178 pA/pF, -0.63 pA/pF) and  
484 (0.198 pA/pF, -0.756 pA/pF) (solid, dotted and dashed line respectively) based on a human ventricular myocytes model.

485 **S9 Fig. Model-dependence test – failed pacemaking activity.**

486 Membrane potential (V) with the current densities of ( $I_{K1}$ ,  $I_f$ ) at (0.198 pA/pF, -1.26 pA/pF) based on a human ventricular  
487 myocytes model.

488 **S1 Text. Model-dependence test.**

## 489 Author Contributions

490 Conceptualization: Henggui Zhang.

491 Data curation: Yacong Li.

492 Formal analysis: Yacong Li, Henggui Zhang, Jules C. Hancox.

493 Funding acquisition: Henggui Zhang.

494 Investigation: Yacong Li.

495 Methodology: Yacong Li, Qince Li, Henggui Zhang.

496 Project administration: Kuanquan Wang, Henggui Zhang.

497 Resources: Kuanquan Wang, Henggui Zhang.

498 Software: Yacong Li, Henggui Zhang.

499 Supervision: Kuanquan Wang, Henggui Zhang.

500 Validation: Yacong Li.

501 Visualization: Yacong Li, Henggui Zhang.

502 Writing – original draft: Yacong Li.

503 Writing – review & editing: Henggui Zhang, Jules C. Hancox.

## 504 References

505 1. Cohen IS, Brink PR, Robinson RB, Rosen MR. The why, what, how and when of biological pacemakers. *Nat Clin Pract*  
506 *Card.* 2005;2(8):374-5.

507 2. Rosen MR. Gene Therapy and Biological Pacing. *New Engl J Med.* 2014;371(12):1158-9.

- 508 3. Rosen MR, Brink PR, Cohen IS, Robinson RB. Cardiac pacing: from biological to electronic ... to biological? *Circ Arrhythm*  
509 *Electrophysiol.* 2008;1(1):54-61.
- 510 4. Rosen MR, Robinson RB, Brink PR, Cohen IS. The road to biological pacing. *Nature reviews Cardiology.*  
511 2011;8(11):656-66.
- 512 5. Wilders R, Verheijck EE, Kumar R, Goolsby WN, van Ginneken AC, Joyner RW, et al. Model clamp and its application to  
513 synchronization of rabbit sinoatrial node cells. *Am J Physiol.* 1996;271(5 Pt 2):H2168-82.
- 514 6. Kapoor N, Galang G, Marban E, Cho HC. Transcriptional suppression of connexin43 by TBX18 undermines cell-cell  
515 electrical coupling in postnatal cardiomyocytes. *J Biol Chem.* 2011;286(16):14073-9.
- 516 7. Freudenberger RS, Wilson AC, Lawrence-Nelson J, Hare JM, Kostis JB. Permanent pacing is a risk factor for the  
517 development of heart failure. *American Journal of Cardiology.* 2005;95(5):671-4.
- 518 8. Cingolani E, Goldhaber JJ, Marban E. Next-generation pacemakers: from small devices to biological pacemakers. *Nature*  
519 *reviews Cardiology.* 2018;15(3):139-50.
- 520 9. Shlapakova IN, Nearing BD, Lau DH, Boink GJJ, Danilo P, Kryukova Y, et al. Biological pacemakers in canines exhibit  
521 positive chronotropic response to emotional arousal. *Heart Rhythm.* 2010;7(12):1835-40.
- 522 10. Kapoor N, Liang WB, Marban E, Cho HC. Direct conversion of quiescent cardiomyocytes to pacemaker cells by expression  
523 of Tbx18. *Nat Biotechnol.* 2013;31(1):54-+.
- 524 11. Miake J, Marban E, Nuss HB. Functional role of inward rectifier current in heart probed by Kir2.1 overexpression and  
525 dominant-negative suppression. *J Clin Invest.* 2003;111(10):1529-36.
- 526 12. Hu YF, Dawkins JF, Cho HC, Marban E, Cingolani E. Biological pacemaker created by minimally invasive somatic  
527 reprogramming in pigs with complete heart block. *Sci Transl Med.* 2014;6(245).
- 528 13. Zhou YF, Yang XJ, Li HX, Han LH, Jiang WP. Mesenchymal stem cells transfected with HCN2 genes by LentiV can be  
529 modified to be cardiac pacemaker cells. *Med Hypotheses.* 2007;69(5):1093-7.
- 530 14. Gorabi AM, Hajighasemi S, Tafti HA, Atashi A, Soleimani M, Aghdami N, et al. TBX18 transcription factor overexpression  
531 in human-induced pluripotent stem cells increases their differentiation into pacemaker-like cells. *Journal of cellular physiology.*  
532 2019;234(2):1534-46.
- 533 15. Noble D. The surprising heart: a review of recent progress in cardiac electrophysiology. *The Journal of physiology.*  
534 1984;353:1-50.
- 535 16. DiFrancesco D. The contribution of the 'pacemaker' current (if) to generation of spontaneous activity in rabbit sino-atrial  
536 node myocytes. *The Journal of physiology.* 1991;434:23-40.
- 537 17. Mesirca P, Torrente AG, Mangoni ME. T-type channels in the sino-atrial and atrioventricular pacemaker mechanism.  
538 *Pflugers Arch.* 2014;466(4):791-9.
- 539 18. Guo J, Ono K, Noma A. A sustained inward current activated at the diastolic potential range in rabbit sino-atrial node cells.  
540 *The Journal of physiology.* 1995;483 ( Pt 1):1-13.
- 541 19. Zaritsky JJ, Redell JB, Tempel BL, Schwarz TL. The consequences of disrupting cardiac inwardly rectifying K<sup>+</sup> current  
542 (I-K1) as revealed by the targeted deletion of the murine Kir2.1 and Kir2.2 genes. *J Physiol-London.* 2001;533(3):697-710.

- 
- 543 20. Miake J, Marban E, Nuss HB. Gene therapy - Biological pacemaker created by gene transfer. *Nature*. 2002;419(6903):132-3.
- 544 21. Qu JH, Barbuti A, Protas L, Santoro B, Cohen IS, Robinson RB. HCN2 overexpression in newborn and adult ventricular  
545 myocytes - Distinct effects on gating and excitability. *Circ Res*. 2001;89(1):E8-E14.
- 546 22. Qu JH, Plotnikov AN, Danilo P, Shlapakova I, Cohen IS, Robinson RB, et al. Expression and function of a biological  
547 pacemaker in canine heart. *Circulation*. 2003;107(8):1106-9.
- 548 23. Plotnikov AN, Sosunov EA, Qu JH, Shlapakova IN, Anyukhovskiy EP, Liu LL, et al. Biological pacemaker implanted in  
549 canine left bundle branch provides ventricular escape rhythms that have physiologically acceptable rates. *Circulation*.  
550 2004;109(4):506-12.
- 551 24. Ionta V, Liang WB, Kim EH, Rafie R, Giacomello A, Marban E, et al. SHOX2 Overexpression Favors Differentiation of  
552 Embryonic Stem Cells into Cardiac Pacemaker Cells, Improving Biological Pacing Ability. *Stem Cell Rep*. 2015;4(1):129-42.
- 553 25. Xue T, Cho HC, Akar FG, Tsang SY, Jones SP, Marban E, et al. Functional integration of electrically active cardiac  
554 derivatives from genetically engineered human embryonic stem cells with quiescent recipient ventricular cardiomyocytes -  
555 Insights into the development of cell-based pacemakers. *Circulation*. 2005;111(1):11-20.
- 556 26. Kehat I, Khimovich L, Caspi O, Gepstein A, Shofti R, Arbel G, et al. Electromechanical integration of cardiomyocytes  
557 derived from human embryonic stem cells. *Nat Biotechnol*. 2004;22(10):1282-9.
- 558 27. Bruzauskaite I, Bironaite D, Bagdonas E, Skeberdis VA, Denkovskij J, Tamulevicius T, et al. Relevance of  
559 HCN2-expressing human mesenchymal stem cells for the generation of biological pacemakers. *Stem Cell Res Ther*. 2016;7.
- 560 28. Zhang H, Li SC, Qu D, Li BL, He B, Wang C, et al. Autologous biological pacing function with adrenergic-responsiveness  
561 in porcine of complete heart block. *Int J Cardiol*. 2013;168(4):3747-51.
- 562 29. Planat-Benard V, Menard C, Andre M, Puceat M, Perez A, Garcia-Verdugo JM, et al. Spontaneous cardiomyocyte  
563 differentiation from adipose tissue stroma cells. *Circ Res*. 2004;94(2):223-9.
- 564 30. Choi YS, Dusting GJ, Stubbs S, Arunothayaraj S, Han XL, Collas P, et al. Differentiation of human adipose-derived stem  
565 cells into beating cardiomyocytes. *J Cell Mol Med*. 2010;14(4):878-89.
- 566 31. Chen L, Deng ZJ, Zhou JS, Ji RJ, Zhang X, Zhang CS, et al. Tbx18-dependent differentiation of brown adipose  
567 tissue-derived stem cells toward cardiac pacemaker cells. *Mol Cell Biochem*. 2017;433(1-2):61-77.
- 568 32. Chauveau S, Anyukhovskiy EP, Ben-Ari M, Naor S, Jiang YP, Danilo P, et al. Induced Pluripotent Stem Cell-Derived  
569 Cardiomyocytes Provide In Vivo Biological Pacemaker Function. *Circ-Arrhythmia Elec*. 2017;10(5).
- 570 33. Gorabi AM, Hajighasemi S, Khori V, Soleimani M, Rajaei M, Rabbani S, et al. Functional biological pacemaker generation  
571 by T-Box18 protein expression via stem cell and viral delivery approaches in a murine model of complete heart block.  
572 *Pharmacological research*. 2019;141:443-50.
- 573 34. Kleber AG, Rudy Y. Basic mechanisms of cardiac impulse propagation and associated arrhythmias. *Physiol Rev*.  
574 2004;84(2):431-88.
- 575 35. Potapova I, Plotnikov A, Lu ZJ, Danilo P, Valiunas V, Qu JH, et al. Human mesenchymal stem cells as a gene delivery  
576 system to create cardiac pacemakers. *Circ Res*. 2004;94(7):952-9.
- 577 36. Plotnikov AN, Shlapakova I, Szabolcs MJ, Danilo P, Lorell BH, Potapova IA, et al. Xenografted adult human mesenchymal  
578 stem cells provide a platform for sustained biological pacemaker function in canine heart. *Circulation*. 2007;116(7):706-13.

- 579 37. Saito Y, Nakamura K, Yoshida M, Sugiyama H, Ohe T, Kurokawa J, et al. Enhancement of Spontaneous Activity by HCN4  
580 Overexpression in Mouse Embryonic Stem Cell-Derived Cardiomyocytes - A Possible Biological Pacemaker. Plos One.  
581 2015;10(9).
- 582 38. Cho HC, Kashiwakura Y, Marban E. Creation of a biological pacemaker by cell fusion. *Circ Res.* 2007;100(8):1112-5.
- 583 39. Azene EM, Xue T, Marban E, Tomaselli GF, Li RA. Non-equilibrium behavior of HCN channels: Insights into the role of  
584 HCN channels in native and engineered pacemakers. *Cardiovasc Res.* 2005;67(2):263-73.
- 585 40. Lieu DK, Chan YC, Lau CP, Tse HF, Siu CW, Li RA. Overexpression of HCN-encoded pacemaker current silences  
586 bioartificial pacemakers. *Heart Rhythm.* 2008;5(9):1310-7.
- 587 41. Kuwabara Y, Kuwahara K, Takano M, Kinoshita H, Arai Y, Yasuno S, et al. Increased Expression of HCN Channels in the  
588 Ventricular Myocardium Contributes to Enhanced Arrhythmicity in Mouse Failing Hearts. *J Am Heart Assoc.* 2013;2(3).
- 589 42. Sun Y, Timofeyev V, Dennis A, Bektik E, Wan XP, Laurita KR, et al. A Singular Role of I-K1 Promoting the Development  
590 of Cardiac Automaticity during Cardiomyocyte Differentiation by I-K1-Induced Activation of Pacemaker Current. *Stem Cell Rev*  
591 *Rep.* 2017;13(5):631-43.
- 592 43. Yang M, Zhang GG, Wang T, Wang X, Tang YH, Huang H, et al. TBX18 gene induces adipose-derived stem cells to  
593 differentiate into pacemaker-like cells in the myocardial microenvironment. *Int J Mol Med.* 2016;38(5):1403-10.
- 594 44. Chen K, Zuo D, Wang SY, Chen H. Kir2 inward rectification-controlled precise and dynamic balances between Kir2 and  
595 HCN currents initiate pacemaking activity. *FASEB J.* 2018;32(6):3047-57.
- 596 45. Silva J, Rudy Y. Mechanism of pacemaking in I-K1-downregulated myocytes. *Circ Res.* 2003;92(3):261-3.
- 597 46. Kurata Y, Hisatome I, Matsuda H, Shibamoto T. Dynamical mechanisms of pacemaker generation in I-K1-downregulated  
598 human ventricular myocytes: Insights from bifurcation analyses of a mathematical model. *Biophys J.* 2005;89(4):2865-87.
- 599 47. Tong WC, Holden AV. Induced pacemaker activity in virtual mammalian ventricular cells. *Lect Notes Comput Sc.*  
600 2005;3504:226-35.
- 601 48. Kurata Y, Matsuda H, Hisatome I, Shibamoto T. Roles of hyperpolarization-activated current  $I_f$  in sinoatrial node  
602 pacemaking: insights from bifurcation analysis of mathematical models. *American journal of physiology Heart and circulatory*  
603 *physiology.* 2010;298(6):H1748-60.
- 604 49. Kurata Y, Matsuda H, Hisatome I, Shibamoto T. Effects of pacemaker currents on creation and modulation of human  
605 ventricular pacemaker: theoretical study with application to biological pacemaker engineering. *American journal of physiology*  
606 *Heart and circulatory physiology.* 2007;292(1):H701-18.
- 607 50. ten Tusscher KH, Panfilov AV. Alternans and spiral breakup in a human ventricular tissue model. *American journal of*  
608 *physiology Heart and circulatory physiology.* 2006;291(3):H1088-100.
- 609 51. Fabbri A, Fantini M, Wilders R, Severi S. Computational analysis of the human sinus node action potential: model  
610 development and effects of mutations. *The Journal of physiology.* 2017;595(7):2365-96.
- 611 52. Verkerk AO, Wilders R, van Borren MM, Peters RJ, Broekhuis E, Lam K, et al. Pacemaker current ( $I_f$ ) in the human  
612 sinoatrial node. *Eur Heart J.* 2007;28(20):2472-8.
- 613 53. Whittaker DG, Ni H, Benson AP, Hancox JC, Zhang H. Computational Analysis of the Mode of Action of Disopyramide and  
614 Quinidine on hERG-Linked Short QT Syndrome in Human Ventricles. *Frontiers in physiology.* 2017;8:759.

615 54. O'Hara T, Virag L, Varro A, Rudy Y. Simulation of the undiseased human cardiac ventricular action potential: model  
616 formulation and experimental validation. *PLoS computational biology*. 2011;7(5):e1002061.

617 55. Irnich W, de Bakker JM, Bisping HJ. Electromagnetic interference in implantable pacemakers. *Pacing Clin Electrophysiol*.  
618 1978;1(1):52-61.

619 56. Plaster NM, Tawil R, Tristani-Firouzi M, Canun S, Bendahhou S, Tsunoda A, et al. Mutations in Kir2.1 cause the  
620 developmental and episodic electrical phenotypes of Andersen's syndrome. *Cell*. 2001;105(4):511-9.

621 57. Boink GJJ, Duan L, Nearing BD, Shlapakova IN, Sosunov EA, Anyukhovskiy EP, et al. HCN2/SkM1 Gene Transfer Into  
622 Canine Left Bundle Branch Induces Stable, Autonomically Responsive Biological Pacing at Physiological Heart Rates. *J Am Coll*  
623 *Cardiol*. 2013;61(11):1192-201.

624 58. ten Tusscher KHWJ, Noble D, Noble PJ, Panfilov AV. A model for human ventricular tissue. *Am J Physiol-Heart C*.  
625 2004;286(4):H1573-H89.

626
